# Supplementary material for: Initial Virome Characterization of the Common Cnidarian Lab Model Nematostella vectensis
Source: MDPI journal article supplement (doi:10.3390/v12020218), 2020-02-15

▼File: Untitled1.syz

IMPORT successfully completed.

▼Factor Analysis

**Latent Roots (Eigenvalues)**

| 1     | 2     | 3     | 4     | 5     | 6     |
|-------|-------|-------|-------|-------|-------|
| 3.161 | 2.278 | 0.389 | 0.151 | 0.014 | 0.006 |

**Component Loadings**

|    | 1     | 2      | 3      | 4      | 5      |
|----|-------|--------|--------|--------|--------|
| C2 | 0.754 | -0.635 | 0.005  | 0.156  | -0.029 |
| C3 | 0.820 | -0.444 | 0.199  | -0.301 | 0.000  |
| C4 | 0.592 | -0.774 | -0.189 | 0.110  | 0.029  |
| C5 | 0.659 | 0.561  | -0.491 | -0.097 | 0.009  |
| C6 | 0.764 | 0.625  | 0.115  | 0.071  | -0.078 |
| C7 | 0.743 | 0.610  | 0.243  | 0.099  | 0.079  |

**Variance Explained by Components**

| 1     | 2     | 3     | 4     | 5     |
|-------|-------|-------|-------|-------|
| 3.161 | 2.278 | 0.389 | 0.151 | 0.014 |

**Percent of Total Variance Explained**

| 1      | 2      | 3     | 4     | 5     |
|--------|--------|-------|-------|-------|
| 52.690 | 37.968 | 6.484 | 2.522 | 0.235 |

Scree Plot

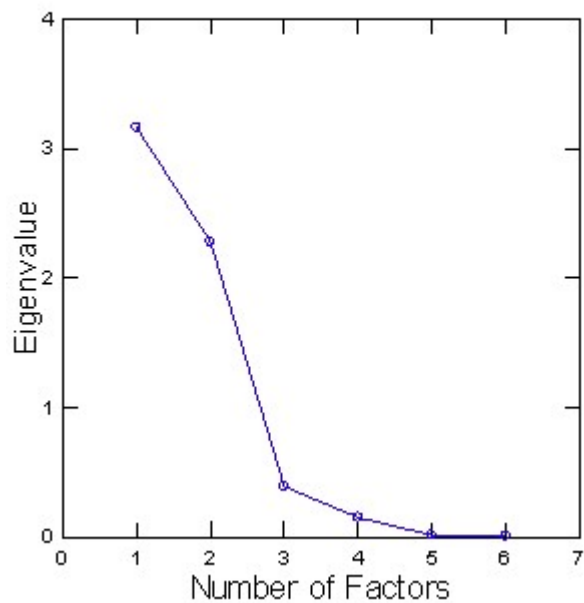

Factor Loadings Plot

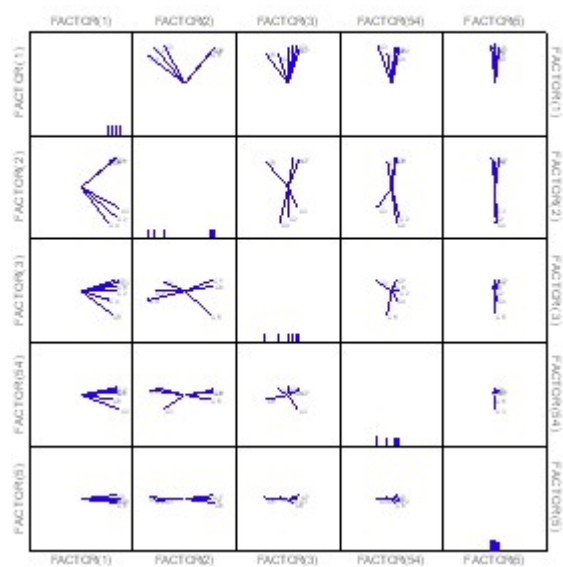

## ► Factor Analysis

### ▼ Hypothesis Testing: Two-sample t-test

#### Two-sample t-test on PCA1 Grouped by PROJECT vs Alternative = 'not equal'

| GROUP | N | Mean  | Standard Deviation |
|-------|---|-------|--------------------|
| 1     | 3 | 0.722 | 0.117              |
| 7     | 3 | 0.722 | 0.056              |

#### Separate Variance

Difference in Means : 0.000  
 95.00% Confidence Interval : -0.246 to 0.246  
 t : 0.000  
 df : 2.854  
 p-value : 1.000

#### Pooled Variance

Difference in Means : 0.000  
 95.00% Confidence Interval : -0.208 to 0.208  
 t : 0.000  
 df : 4.000  
 p-value : 1.000

#### Two-sample t-test

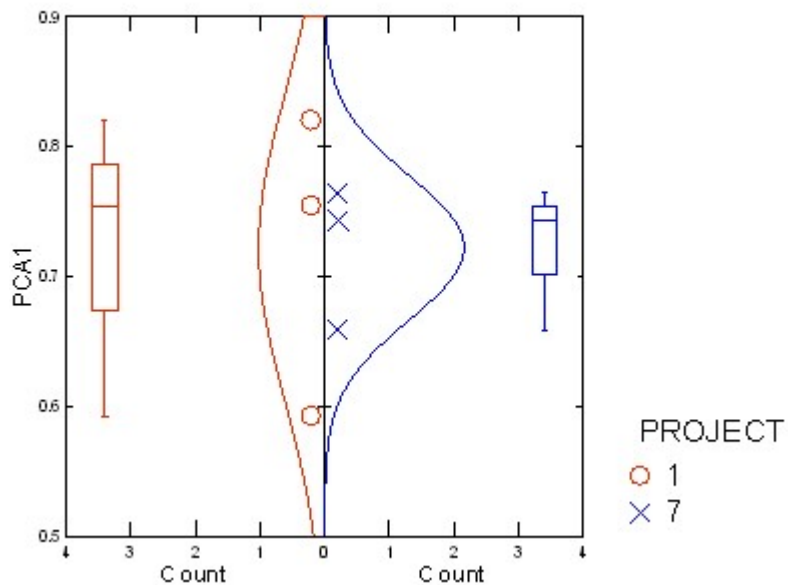

### ▼ Hypothesis Testing: Two-sample t-test

#### Two-sample t-test on PCA2 Grouped by PROJECT vs Alternative = 'not equal'

| GROUP | N | Mean   | Standard<br>Deviation |
|-------|---|--------|-----------------------|
| 1     | 3 | -0.616 | 0.168                 |
| 7     | 3 | 0.599  | 0.033                 |

#### Separate Variance

Difference in Means : -1.215  
 95.00% Confidence Interval : -1.611 to -0.819  
 t : -12.300  
 df : 2.159  
 p-value : 0.005

#### Pooled Variance

Difference in Means : -1.215  
 95.00% Confidence Interval : -1.489 to -0.941  
 t : -12.300  
 df : 4.000  
 p-value : 0.000

#### Two-sample t-test

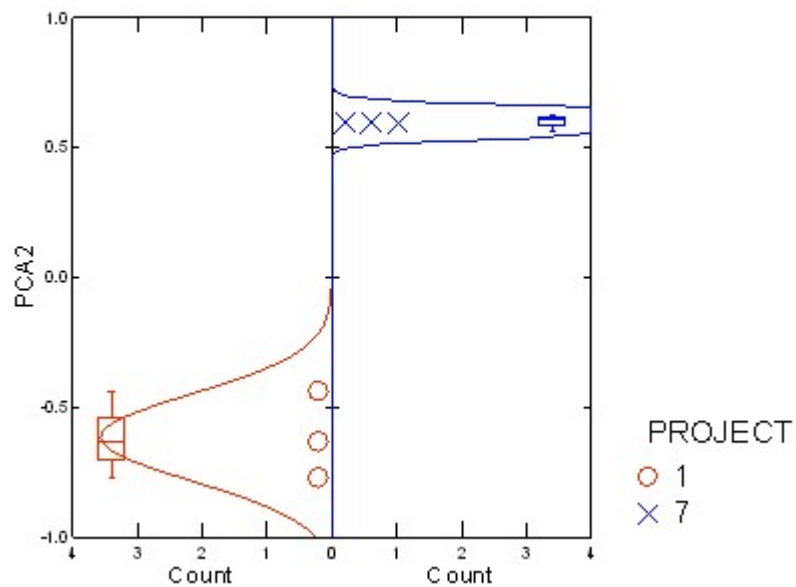

Supplement: s1 [file s1]
